# Supplementary material for: Augmentation in photocurrent through organic ionic plastic crystals as an efficient redox mediator for solid-state mesoscopic photovoltaic devices
Source: Royal Society of Chemistry journal article supplement (doi:10.1039/d0se01527j), 2021-01-01
Supplement: d0se01527j1.pdf [file d0se01527j1.pdf]

## Supporting Information

### **Augmentation in Photocurrent through Organic Ionic Plastic Crystals as Efficient Redox Mediator for Solid-State Mesoscopic Photovoltaic Devices**

*Keval K. Sonigara,<sup>a</sup> Jayraj V. Vaghasiya,<sup>a</sup> Jyoti Prasad,<sup>a</sup> Hiren K. Machhi,<sup>a</sup> Mohammad Shaad  
Ansari,<sup>c,d</sup> Mohammad Qureshi,<sup>\*d</sup> Saurabh S. Soni<sup>\*,a,b</sup>*

<sup>a</sup>Department of Chemistry, Sardar Patel University, Vallabh Vidyanagar-388 120, Gujarat  
(India).

<sup>b</sup>P. G. Department of Applied & Interdisciplinary Sciences, IICISST, Sardar Patel University,  
Vallabh Vidyanagar-388 120, Gujarat (India).

<sup>c</sup>School of Chemical Engineering, Yeungnam University, Gyeongsan, Gyeongbuk-do, 38541,  
Republic of Korea (Email : [shaadansari25@gmail.com](mailto:shaadansari25@gmail.com))

<sup>d</sup>Materials Science Laboratory, Department of Chemistry, Indian Institute of Technology  
Guwahati, 781039, Assam (India)

**Table S1.** Photovoltaic performance reported OIPC based electrolytes with various sensitizers in MPDs

| Sr. No. | Dye   | electrolyte                                                                                                                      | OIPC                     | Additives                                | Efficiency (%) | Ref |
|---------|-------|----------------------------------------------------------------------------------------------------------------------------------|--------------------------|------------------------------------------|----------------|-----|
| 01      | N719  | [P <sub>1222</sub> ][FSA] (4.71 M), LiI (0.78 M), I <sub>2</sub> (0.24M), and 4-tBP (3.92 M)                                     | [P <sub>1222</sub> ]FSA  | SiO <sub>2</sub>                         | 7.40           | 1   |
| 02      | N719  | [P <sub>1222</sub> ][TFSA] (4.71 M), LiI (0.78 M), I <sub>2</sub> (0.24M), and 4-tBP (3.92 M)                                    | [P <sub>1222</sub> ]TFSA | SiO <sub>2</sub>                         | 5.84           | 1   |
| 03      | N719  | 0.600 M BII-6, 0.0300 M I <sub>2</sub> , 0.100 M GuSCN, and 0.500 M 4-tBP in MeCN                                                | BII-6                    | Nil                                      | 4.93           | 2   |
| 04      | N719  | 0.600 M BII-8, 0.0300 M I <sub>2</sub> , 0.100 M GuSCN, and 0.500 M 4-tBP MeCN                                                   | BII-8                    | Nil                                      | 4.06           | 2   |
| 05      | N719  | 20 wt% (PMII), 0.5 M (NBB), 5 wt% (LiTFSI), and 0.05 M I <sub>2</sub> in N <sub>44</sub> TFSI                                    | N <sub>44</sub> TFSI     | Nil                                      | 5.4            | 3   |
| 06      | Z907  | P <sub>12</sub> I/30 wt%PMII/7.5wt%CNTs/1% I <sub>2</sub>                                                                        | P <sub>12</sub> I        | CNTs                                     | 5.60           | 4   |
| 07      | N719  | DMPII:I <sub>2</sub> :SCN                                                                                                        | Hybrid (SCN)             | DMPII                                    | 6.3            | 5   |
| 08      | N719  | BMII:I <sub>2</sub> :SCN                                                                                                         | Hybrid (SCN)             | BMII                                     | 5.6            | 5   |
| 09      | CdS   | 2-Succinonitrile/Na <sub>2</sub> S                                                                                               | SN and Na <sub>2</sub> S | Nil                                      | 1.29           | 6   |
| 10      | MK2   | 40 wt% PMII and CPMPI with 0.1 M LiI and 0.10 M I <sub>2</sub>                                                                   | CPMPI                    | PMII                                     | 5.22           | 7   |
| 11      | MK2   | 15 wt% (1 M) C <sub>16</sub> MImI, 10 wt% (0.5 M) [MeIm-TEMPO][TFSI], 3 wt% (0.5 M) 4-tBP and 0.58 wt% (0.1) M NOPF <sub>6</sub> | P <sub>12</sub> TFSI     | [MeIm-TEMPO][TFSI], C <sub>16</sub> MImI | 5.16           | 8   |
| 12      | Z-907 | P <sub>13</sub> I + 20 wt % EMII 10 wt % SiO <sub>2</sub> , 0.2 M I <sub>2</sub>                                                 | P <sub>13</sub> I        | SiO <sub>2</sub>                         | 4.90           | 9   |
| 13      | N719  | PMII and BMII in succinonitrile with a mole ratio of 2:1:125, and then LiClO <sub>4</sub> 5 wt%                                  | PMII + BMII              | LiClO <sub>4</sub>                       | 5.50           | 10  |
| 14      | N719  | MAII-SN, 0.1 M I <sub>2</sub> , 0.5 M 4-tBP                                                                                      | SN                       | MAII                                     | 6.64           | 11  |
| 15      | N719  | EMII-SN, 0.1 M I <sub>2</sub> , 0.5 M 4-tBP                                                                                      | SN                       | EMII                                     | 7.46           | 11  |
| 16      | N719  | SN, I <sub>2</sub> , DMAIIs, and NMBI in a 100:1:6:0.5mole ratio                                                                 | SN                       | DMBI, DMAIIs                             | 7.8            | 12  |
| 17      | Z-907 | PMII and I <sub>2</sub> 0.1M                                                                                                     | PMII                     | -                                        | 4.78           | 13  |
| 18      | Z-907 | 0.2 g PMII, 0.8 g P <sub>12</sub> TFSI and 0.0142 g I <sub>2</sub> 0.1M                                                          | PMII                     | -                                        | 3.92           | 13  |
| 19      | Z-907 | 0.2 g PMII, 0.8 g P <sub>12</sub> TFSI and 0.0142 g I <sub>2</sub> (0.1M), 0.5M NBB                                              | PMII                     | -                                        | 4.01           | 13  |
| 20      | Z-907 | 0.2 g PMII, 0.8 g P <sub>12</sub> TFSI and 0.0142 g I <sub>2</sub> 0.1M, 0.5M NBB, 0.1 M LiI                                     | PMII                     | -                                        | 4.64           | 13  |

|    |       |                                                                                                          |                                            |                  |      |           |
|----|-------|----------------------------------------------------------------------------------------------------------|--------------------------------------------|------------------|------|-----------|
| 21 | Z-907 | 35 wt% PMII doped P <sub>12</sub> I and 0.2 M I <sub>2</sub>                                             | P <sub>12</sub> I                          | PMII             | 4.85 | 14        |
| 22 | N719  | [C <sub>1</sub> mpyr][N(CN) <sub>2</sub> ], LiI 0.1 M and I <sub>2</sub> 0.23 M                          | [C <sub>1</sub> mpyr][N(CN) <sub>2</sub> ] | NiL              | 5.1  | 15        |
| 23 | N719  | [C <sub>4</sub> mpyr][I] 0.4 M, LiI 0.1 M, I <sub>2</sub> 0.1 M, NMB 0.2 M + 5wt% SiO <sub>2</sub> in SN | [C <sub>4</sub> mpyr][I]                   | SiO <sub>2</sub> | 4.8  | 16        |
| 24 | SK4   | 0.6M OIPC-I, 0.03M I <sub>2</sub> , 0.1M 4-tBP                                                           | OIPC -I                                    | NiL              | 7.60 | This work |
| 25 | SK4   | OIPC -I                                                                                                  | OIPC -I                                    | NiL              | 3.17 | This work |
| 26 | SK4   | 0.6M OIPC -Br, 0.03M Br <sub>2</sub> , 0.1M 4-tBP                                                        | OIPC -Br                                   | NiL              | 5.38 | This work |
| 27 | SK4   | OIPC -Br                                                                                                 | OIPC -Br                                   | NiL              | 2.04 | This work |

Triethyl(methyl)phosphoniumbis-(trifluoromethanesulfonyl)amide [P<sub>1222</sub>][TFSA], triethyl- (methyl) phosphoniumbis-(fluorosulfonyl)amide [P<sub>1222</sub>][FSA], 1,2-Bis[N-(N0-hexylimidazolium)]ethane diiodide [BII-6], 1,2-Bis[N-(N0-octylimidazolium)]ethane diiodide [BII-8], 5-azoniaspiro [4.4]nonane bis(trifluoromethanesulfonyl)imide [N<sub>44</sub>TFSI], 1-ethyl-1-methyl pyrrolidinium iodide [P<sub>12</sub>I], N-ethyl- N-methylpyrrolidinium tetrafluoroborate [C<sub>2</sub>mpyrBF<sub>4</sub>], 1,2-dimethyl-3-propyl imidazolium iodide [DMPII], 1-butyl-3-methyl imidazolium iodide [BMII], lithium iodide [LiI], iodine [I<sub>2</sub>], 1-cyanopropyl-1-methylpyrrolidinium iodide [CPMPI], 1-propyl-3-methylimidazolium iodine [PMII], 1-ethyl-1-methylpyrrolidinium bis(trifluoromethanesulfonyl) Imide [P<sub>12</sub>TFSI], 1-methyl-3-(2-oxo-2-(2,2,6,6-tetramethyl-1-oxyl-4-piperid-oxyl)butyl) imidazolium bis(trifluoromethanesulfonyl)imide [MeIm-TEMPO][TFSI], 1-hexadecyl-3-methyl imidazolium iodide [C<sub>16</sub>MImI], 1-Propyl-1-methylpyrrolidinium iodine [P<sub>13</sub>I], Succinonitrile [SN], 1-methyl-3-acetylimidazolium iodide [MAII], 1-ethyl-3-methylimidazolium iodide [EMII], 1-alkyl-2,3-dimethylimidazolium iodides [DMAIIs], N-methylbenzimidazole [NMBI], N-butylbenzimidazole [NBB], N-methyl-N-ethylpyrrolidiniumdicyanamide [C<sub>1</sub>mpyr][N(CN)<sub>2</sub>], N-butyl-N-methylpyrrolidinium iodide [C<sub>4</sub>mpyr][I], Carbon nanotubes (CNTs), 4-tert-butylpyridine (4-TBP)

**Table S2.** Photovoltaic performance reported for bromide/tribromide ( $Br^-/Br_3^-$ ) based electrolytes with various sensitizers in MPDs

| Dye   | Nano particle                       | Electrolyte                                                                                                    | $V_{oc}$ | Efficiency | Ref   |
|-------|-------------------------------------|----------------------------------------------------------------------------------------------------------------|----------|------------|-------|
| SFD-5 | Mg-doped $TiO_2$                    | 0.05 M $Br_2$ + 0.50 M LiBr + 0.10 M BMImBr in AN/VN(9 : 1 in volume).                                         | 0.98     | 1.0        | 17    |
| SFD-5 | Mg-doped $TiO_2$                    | 0.03 M $Br_2$ + 0.65 M BMImBr + 0.20 M TPABr + 0.07MTBP + 0.07MGuNCS in AN/VN/EC/THF (4 : 3 : 2 : 1 in volume) | 1.13     | 1.1        | 17    |
| SFD-5 | Mg-doped $TiO_2$ (MgO, $CH_3COOH$ ) | 0.03 M $Br_2$ + 0.65 M BMImBr + 0.20 M TPABr + 0.07MTBP + 0.07MGuNCS in AN/VN/EC/THF (4 : 3 : 2 : 1 in volume) | 1.21     | 1.2        | 18    |
| TC301 | $TiO_2$ (12+4 $\mu m$ )             | 0.9m DMBIBr, 0.08m $Br_2$ , and 0.5m TBP electrolyte in dry $CH_3CN$ .                                         | 1.156    | 3.68       | 19,20 |
| TC301 | $TiO_2$ (12+4 $\mu m$ )             | 0.9m DMBIBr, 0.8m LiBr,0.08m $Br_2$ , and 0.5m TBP electrolyte in dry $CH_3CN$                                 | 1.041    | 3.68       | 19,20 |
| TC302 | $TiO_2$                             | 0.9m DMBIBr, 0.08m $Br_2$ , and 0.5m TBP electrolyte in dry $CH_3CN$ .                                         | 1.091    | 4.05       | 19    |
| TC302 | $TiO_2$ (12+4 $\mu m$ )             | 0.9m DMBIBr, 0.8m LiBr,0.08m $Br_2$ , and 0.5m TBP electrolyte in dry $CH_3CN$                                 | 1.009    | 3.98       | 19    |
| TC303 | $TiO_2$ (12+4 $\mu m$ )             | 0.9m DMBIBr, 0.08m $Br_2$ , and 0.5m TBP electrolyte in dry $CH_3CN$ .                                         | 1.077    | 3.28       | 19    |
| TC303 | $TiO_2$                             | 0.9m DMBIBr, 0.8m LiBr,0.08m $Br_2$ , and 0.5m TBP electrolyte in dry $CH_3CN$                                 | 0.969    | 3.13       | 19    |
| TC305 | $TiO_2$ (12+4 $\mu m$ )             | 0.9m DMBIBr, 0.08m $Br_2$ , and 0.5m TBP electrolyte in dry $CH_3CN$ .                                         | 1.033    | 4.61       | 19    |
| TC305 | $TiO_2$                             | 0.9m DMBIBr, 0.8m LiBr, 0.08m $Br_2$ , and 0.5m TBP electrolyte in dry $CH_3CN$                                | 0.959    | 4.54       | 19    |
| TC306 | $TiO_2$ (12+4 $\mu m$ )             | 0.9m DMBIBr, 0.08m $Br_2$ , and 0.5m TBP electrolyte in dry $CH_3CN$ .                                         | 0.939    | 5.22       | 19,20 |
| TC306 | $TiO_2$                             | 0.9m DMBIBr, 0.8m LiBr, 0.08m $Br_2$ , and 0.5m TBP electrolyte in dry $CH_3CN$                                | 0.915    | 5.07       | 19,20 |
| TC308 | $TiO_2$ (12+4 $\mu m$ )             | 0.9m DMBIBr, 0.08m $Br_2$ , and 0.5m TBP electrolyte in dry $CH_3CN$ .                                         | 1.045    | 4.06       | 19    |
| TC308 | $TiO_2$                             | 0.9m DMBIBr, 0.8m LiBr, 0.08m $Br_2$ , and 0.5m TBP electrolyte in dry $CH_3CN$                                | 0.976    | 3.85       | 19    |
| TC309 | $TiO_2$ (12+4 $\mu m$ )             | 0.9m DMBIBr, 0.08m $Br_2$ , and 0.5m TBP electrolyte in dry $CH_3CN$ .                                         | 1.015    | 3.38       | 19    |
| TC309 | $TiO_2$ (12+4 $\mu m$ )             | 0.9m DMBIBr, 0.8m LiBr, 0.08m $Br_2$ , and 0.5m                                                                | 0.960    | 3.63       | 19    |

|              |                            | TBP electrolyte in dry CH <sub>3</sub> CN             |       |      |           |
|--------------|----------------------------|-------------------------------------------------------|-------|------|-----------|
| Coumarin 343 | TiO <sub>2</sub> (6 μm)    | 0.4 M LiBr + 0.04 M Br <sub>2</sub>                   | 0.428 | 0.70 | 21        |
| Eosin Y      | TiO <sub>2</sub> (6 μm)    | 0.4 M LiBr + 0.04 M Br <sub>2</sub>                   | 0.813 | 2.61 | 21        |
| N719         | TiO <sub>2</sub> (6 μm)    | 0.4 M LiBr + 0.04 M Br <sub>2</sub>                   | 0.556 | 1.05 | 21        |
| TC301        | TiO <sub>2</sub> (12+4 μm) | 0.05 M Br <sub>2</sub> , 0.6 M BDMIBr                 | 0.79  | 1.58 | 22        |
| TC301        | TiO <sub>2</sub> (12+4 μm) | 0.05 M Br <sub>2</sub> , 0.6 M BDMIBr with 0.5 M TBP  | 1.06  | 2.68 | 22        |
| TC301        | TiO <sub>2</sub> (12+4 μm) | 0.05 M Br <sub>2</sub> , 0.6 M BDMIBr with 0.5 M IPIN | 0.95  | 3.30 | 22        |
| TC301        | TiO <sub>2</sub> (12+4 μm) | 0.05 M Br <sub>2</sub> , 0.6 M BDMIBr with 0.5 M PIN  | 0.92  | 2.81 | 22        |
| TC302        | TiO <sub>2</sub> (12+4 μm) | 0.05 M Br <sub>2</sub> , 0.6 M BDMIBr                 | 0.80  | 1.65 | 22        |
| TC302        | TiO <sub>2</sub> (12+4 μm) | 0.05 M Br <sub>2</sub> , 0.6 M BDMIBr with 0.5 M TBP  | 1.00  | 2.99 | 22        |
| TC302        | TiO <sub>2</sub> (12+4 μm) | 0.05 M Br <sub>2</sub> , 0.6 M BDMIBr with 0.5 M IPIN | 0.94  | 3.76 | 22        |
| TC302        | TiO <sub>2</sub> (12+4 μm) | 0.05 M Br <sub>2</sub> , 0.6 M BDMIBr with 0.5 M PIN  | 0.91  | 3.35 | 22        |
| SK4          | TiO <sub>2</sub> (9+3 μm)  | BMIBr/Br <sub>2</sub> + 4-TBP                         | 0.956 | 3.82 | This work |
| SK4          | TiO <sub>2</sub> (9+3 μm)  | 0.6M OIPC -Br, 0.03M Br <sub>2</sub> , 0.1M 4-TBP     | 0.980 | 5.38 | This work |
| SK4          | TiO <sub>2</sub> (9+3 μm)  | OIPC-Br Single component                              | 0.857 | 2.07 | This work |

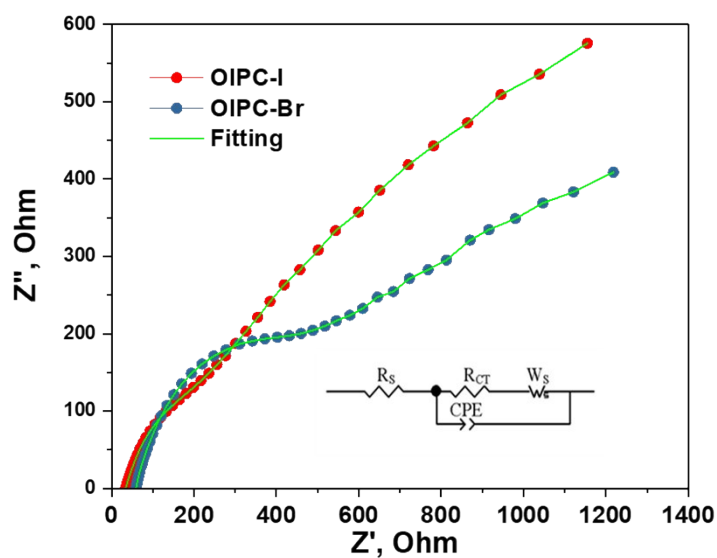

**Figure S1** Nyquist plot of OIPCs between two platinum electrodes used to derive diffusion coefficient (Inset: equivalent circuit model used for fitting)

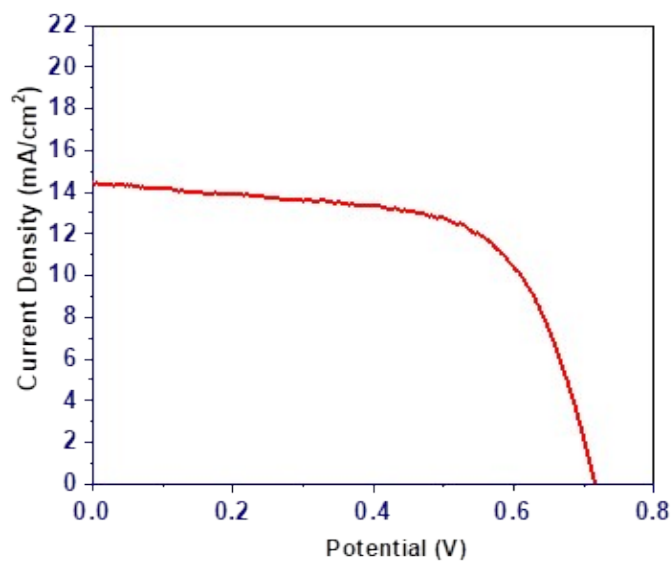

**Figure S2.** Performance of SK4 dye with conventional reference imidazolium-based electrolyte at 100 mW/cm<sup>2</sup>

## Calculation for TRPL parameters

The kinetic decay curves are fitted in the using following equation.

$$I(t) = \sum \alpha_i \exp\left(-\frac{t}{\tau_i}\right)$$

Where,  $\alpha_i$  is the amplitude of decay component,  $I$  possess a lifetime of  $\tau$ ,  $I$  is the normalized emission intensity,  $t$  is the time after pulsed laser excitation.

The average excited state lifetime values for the sample calculated by;

$$\langle \tau \rangle = \frac{\alpha_1 \tau_1^2 + \alpha_2 \tau_2^2}{\alpha_1 \tau_1 + \alpha_2 \tau_2}$$

$$\tau_{amp} = \frac{\alpha_1 \tau_1 + \alpha_2 \tau_2}{\alpha_1 + \alpha_2}$$

Amplitude weighted lifetime;

Percentage of energy transfer efficiency;  $\eta_{ET} = \left(1 - \frac{\tau_{Acceptor + Doner}}{\tau_{Doner}}\right) \times 100$

Electron transfer rate constants for the electron injection

$$k_{ei} = \left\{ \left( \frac{1}{\tau_{SK4 + TiO2} + OIPC - I} \right) - \left( \frac{1}{\tau_{SK4 + TiO2}} \right) \right\}$$

**Table S3** TRPL calculation fitting parameter ( $\chi$ ), emission intensity ( $\alpha_1, \alpha_2, \alpha_3$ ), excited-state lifetime ( $\tau_1, \tau_2, \tau_3$ ) and average exciton lifetime ( $\langle \tau \rangle$ )

| Dye                          | $\chi^2$ | $\alpha_1$ | $\alpha_2$ | $\alpha_3$ | $\tau_1$<br>(ns) | $\tau_2$<br>(ns) | $\tau_3$<br>(ns) | $\langle \tau \rangle$<br>(ns) | Kei<br>(ns) | $\eta_{ET}$<br>(%) |
|------------------------------|----------|------------|------------|------------|------------------|------------------|------------------|--------------------------------|-------------|--------------------|
| TiO <sub>2</sub> -SK4-OIPC-I | 0.998    | 75.589     | 24.411     | -          | 0.065            | 0.524            | -                | 0.294                          | 2.48        | 44.8               |
| TiO <sub>2</sub> -SK4        | 1.003    | 40.703     | 37.491     | 21.806     | 0.094            | 0.403            | 1.461            | 0.652                          |             |                    |

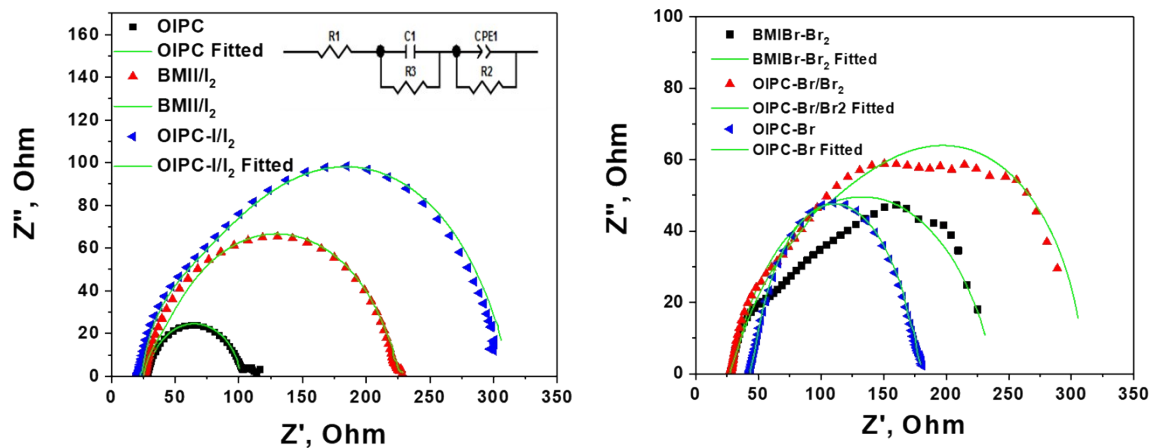

**Figure S3** Nyquist plots of ss-MPDs were carried out from EIS under a dark condition with forward bias **(a)** OIPC-I based at 0.6 V and **(b)** OIPC-Br based devices at 0.9 V (Equivalent circuit for fitting of Nyquist plots)



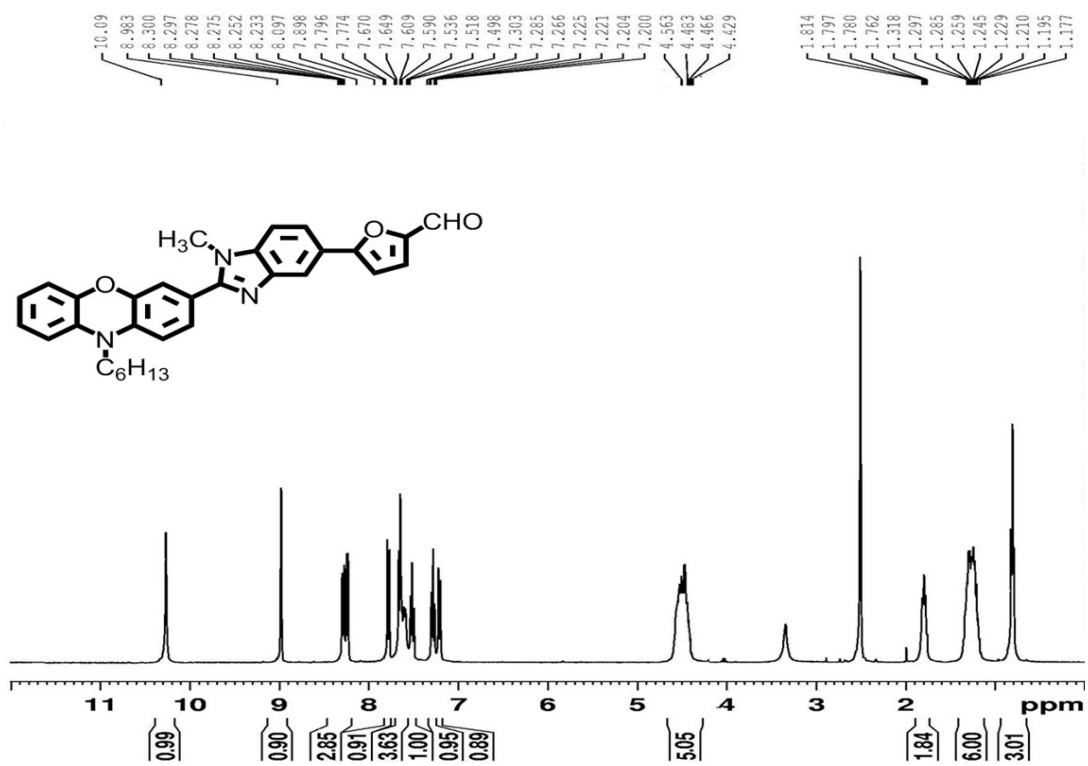

Figure S4 <sup>1</sup>H-NMR of compound (i)

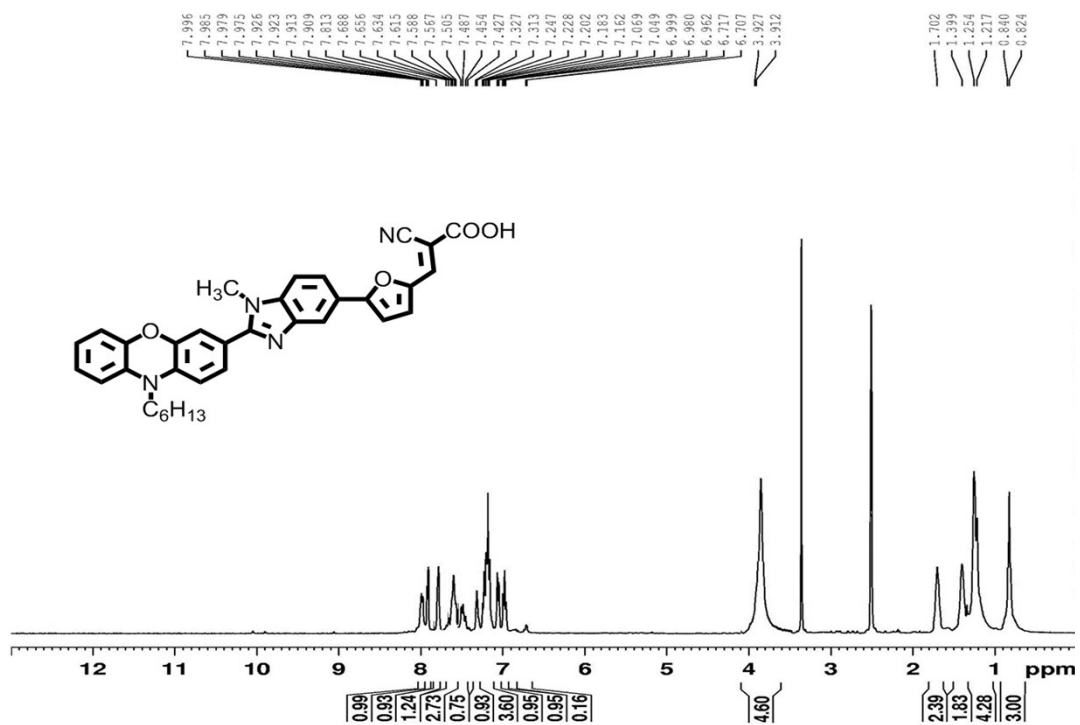

Figure S5 <sup>1</sup>H-NMR of SK4 dye

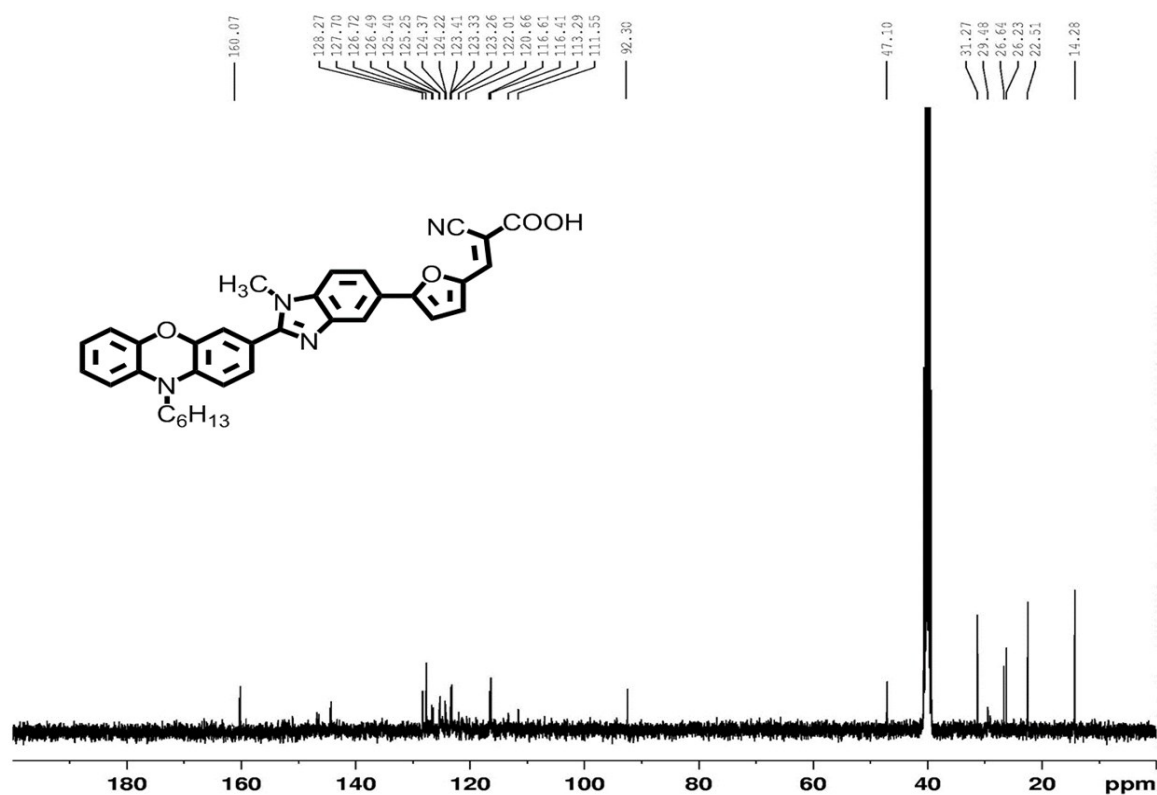

**Figure S6** <sup>13</sup>C-NMR of SK4 dye

## References

- S1. Annkatrin Lennert, Klaudia Wagner, Ruhamah Yunis, Jennifer M. Pringle, Dirk M. Guldi, and David L. Officer, *ACS Appl. Mater. Interfaces* 2018, 10, 32271.
- S2. Minjae Lee, Yong-Hoon Lee, Jong Hyeok Park, U Hyeok Choi, *Organic Electronics*, 2017, 48, 241e247.
- S3. Hao Li, Shichao Li, Ye Zhang and Feng Yan, *RSC Adv.*, 2016, 6, 346.
- S4. Yun Wang, Pengfei Sun, Shan Cong, Jie Zhao, Guifu Zou, *Carbon*, 2015, 92, 262.
- S5. Owen Byrne, Aoife Coughlan, Praveen K. Surolia and K. Ravindranathan Thampi, *Prog. Photovolt: Res. Appl.* 2015, 23, 417.
- S6. Jialong Duan, Qunwei Tang, Benlin He and Haiyan Chen, *RSC Adv.*, 2015, 5, 33463.
- S7. Shan Cong, Yun Wang, Qinghua Yi, Jie Zhao, Yinghui Sun, Mingrong Shen and Guifu Zou, *J. Mater. Chem. A*, 2014, 2, 20147.
- S8. Shichao Li, Lihua Qiu, Chengzhen Shi, Xiaojian Chen, and Feng Yan, *Adv. Mater.* 2014, 26, 1266.

- S9. Chengzhen Shi, Lihua Qiu, Xiaojian Chen, Haigang Zhang, Lei Wang, and Feng Yan, *ACS Appl. Mater. Interfaces* 2013, 5, 1453.
- S10. Junnian Chen, Tianyou Peng, Ke Fan, Renjie Li, Jiangbin Xia, *Electrochimica Acta* 2013, 94, 1.
- S11. Xiaoming Huang, Da Qin, Xiaolu Zhang, Yanhong Luo, Shuqing Huang, Dongmei Li and Qingbo Meng, *RSC Adv.*, 2013, 3, 6922.
- S12. Daesub Hwang, Dong Young Kim, Seong Mu Jo, Vanessa Armel, Douglas R. MacFarlane, Dongho Kim, Sung-Yeon Jang, *Scientific reports*, 2013, 3, 3520.
- S13. Qing Li, Xiaojian Chen, Jie Zhao, Lihua Qiu, Yueguang Zhang, Baoquan Sun and Feng Yan, *J. Mater. Chem.*, 2012, 22, 6674.
- S14. Qing Li, Jie Zhao, Baoquan Sun, Bencai Lin, Lihua Qiu, Yueguang Zhang, Xiaojian Chen, Jianmei Lu, and Feng Yan, *Adv. Mater.* 2012, 24, 945.
- S15. Vanessa Armel, Maria Forsyth, Douglas R. MacFarlane, and Jennifer M. Pringle, *Energy Environ. Sci.*, 2011, 4, 2234.
- S16. V. Armel, J. M. Pringle, P. Wagner, M. Forsyth, D. L. Officer, and D. R. MacFarlane, *Chem. Commun.* 2011, 47, 9327.
- S17. Kenji Kakiage, Toru Tokutome, Shinji Iwamoto, Toru Kyomen and Minoru Hanaya, *Chem. Commun.*, 2013, 49, 179-180.
- S18. C. Teng, X. Yang, S. Li, M. Cheng, A. Hagfeldt, L. Z. Wu and L. Sun, *Chem.–Eur. J.*, 2010, 16, 13127.
- S19. C. Teng, X. Yang, C. Yuan, C. Li, R. Chen, H. Tian, S. Li, A. Hagfeldt and L. Sun, *Org. Lett.*, 2009, 11, 5542.
- S20. Z. Wang, K. Sayama and H. Sugihara, *J. Phys. Chem. B*, 2005, 109, 22449.
- S21. Omid Bagheri, Hossein Dehghani, and Malihe Afrooz, *RSC Adv.*, 2015, 5, 86191.
